# Supplementary material
Source: publisher figshare collection journal article supplement (https://gsajournals.figshare.com/articles/dataset/_/8066615)

**SUPPLEMENTAL MATERIAL** for**Roles of Filamentation Signaling Pathways in  
Regulating Adhesion-Dependent Surface Responses in  
Yeast**

by Jacky Chow <sup>1</sup>, Izzy Starr <sup>1</sup>, Sheida Jamalzadeh <sup>2</sup>, Omar Muniz <sup>1,a</sup>, Anuj Kumar <sup>3</sup>,  
Omer Gokcumen <sup>1</sup>, Denise M. Ferkey <sup>1</sup> and Paul J. Cullen <sup>1</sup> †

**Figure S1. Colony pattern formation on different media.** Wild-type and the indicated deletion mutants were grown on the indicated media for the indicated times. At right, close up of several example colonies.

**Figure S2. Additional examples of colony pattern formation on different media.** Wild-type and the indicated deletion mutants were grown on the indicated media for the indicated times. At right, close up of several example colonies.

**Figure S3. Average ruffles per radius for full time-course.** The average number of ruffles per time point counted in wild-type colonies and the indicated mutants at 1 day intervals for 8 days. The experiment was performed with six replicates. Error bars represent the standard deviation between experiments.

**Figure S4. Sample generation for RNAseq and initial comparisons. A-D)** Models of the pathways and protein complexes examined in the study. Details of the pathways have been described previously and are adapted here (STERNER *et al.* 1999; ZAMAN *et al.* 2008; CULLEN AND SPRAGUE 2012; JAZWINSKI AND KRIETE 2012). Not all proteins that comprise or regulate the pathways or protein complexes are shown. Key regulators tested here have been underlined. **E)** Representative images of colonies harvested for comparative RNAseq. All samples were compared against each other. **F)** Venn diagram shows distribution of differentially expressed targets among mutants. Differential expression defined by  $|\log_2(\text{Fold Change})| > 0.585$  and  $p\text{-value} < 0.01$ . Diagram shows abundance of pathway-specific and shared targets.

**Figure S5. Regulatory feedback among network nodes. A)** Heat map showing regulatory feedback among indicated regulators and regulatory pathways in the signaling network. **B)** Diagram showing regulatory patterns of the RTG, RAS, fMAPK, and SAGA nodes, based on the supplemental data in *Fig. S5A*.

**Figure S6. Distribution of *ras2Δ* and *rtg3Δ* targets.** Heat map showing targets differentially regulated in the *ras2Δ* or *rtg3Δ* mutants with  $p\text{-value} < 10^{-12}$ .

**Figure S7. Citric acid cycle components regulated by the RAS and RTG pathways.** KEGG pathway map showing regulation of indicated citric acid cycle components with differential regulation in the *ras2Δ* or *rtg3Δ* mutants. Blue shading indicates down

regulation in *ras2Δ* (left), *rtg3Δ* (right), or both (solid). Numbers are Enzyme Commission numbers.

**Figure S8. Distribution of *dig1Δ* and *ste12Δ* targets.**

Heat map showing targets differentially regulated in the *dig1Δ* or *ste12Δ* mutants with p-value  $< 10^{-12}$ .

**Figure S9. Distribution of plate specific targets by role.** Pie chart showing distribution of functional classification of genes. Boxes show the ranking and gene name for a selection of targets with  $> 45$ -fold increase in expression.

**Figure S10. Deletion mutants of major colony-specific targets.** **A)** Wild-type and indicated mutant colonies were grown on YEP-Gal agar media and photographed. **B)** Wild-type and indicated mutants from *Fig. S10A* were examined after plate washing. Washed images are shown as inverted images for ease of viewing.

**Figure S11. Effect of low oxygen on colony growth.** Wild-type, *dig1Δ*, and *ste12Δ* were plated onto normal YEPD media (2% Glu) or excess glucose (8% Glu) agar media at three levels of oxygen: anaerobic, low oxygen, and normal oxygen. Colony size was measured over six days.

**Figure S12. Effect of surface-specific stresses on the phenotypes of mutants lacking target genes.** Indicated strains were grown in the indicated stress conditions and normal conditions.

## SUPPLEMENTAL VIDEOS

**Supplementary Video 1. Time-lapse photography of wild-type mats.** Mat formation by wild-type cells (PC538). OD  $A_{600} = 20$  cells were grown on YEP-Gal semi-solid agar media, at 22°C for 8 days. Photographs were taken every 30 min.

**Supplementary Video 2. Time-lapse photography of *flo11Δ* mats.** Mat formation of *flo11Δ* cells (PC1029). OD  $A_{600} = 20$  cells were grown on YEP-Gal semi-solid agar media, at 22°C for 8 days. Photographs were taken every 30 min.

**Supplementary Video 3. Time-lapse photography of *dig1Δ* mats.** Mat formation of *dig1Δ* cells (PC3039). OD  $A_{600} = 20$  cells were grown on YEP-Gal semi-solid agar media, at 22°C for 8 days. Photographs were taken every 30 min.

**Supplementary Video 4. Time-lapse photography of *stel2Δ* mats.** Mat formation of *stel2Δ* cells (PC1079). OD  $A_{600} = 20$  cells were grown on YEP-Gal semi-solid agar media, at 22°C for 8 days. Photographs were taken every 30 min.

**Supplementary Video 5. Time-lapse photography of *ras2Δ* mats.** Mat formation of *ras2Δ* cells (PC562). OD A<sub>600</sub> = 20 cells were grown on YEP-Gal semi-solid agar media, at 22°C for 8 days. Photographs were taken every 30 min.

**Supplementary Video 6. Time-lapse photography of *rtg3Δ* mats.** Mat formation of *rtg3Δ* cells (PC3642). OD A<sub>600</sub> = 20 cells were grown on YEP-Gal semi-solid agar media, at 22°C for 8 days. Photographs were taken every 30 min.

**Supplementary Video 7. Time-lapse photography of *spt8Δ* mats.** Mat formation of *spt8Δ* cells (PC4008). OD A<sub>600</sub> = 20 cells were grown on YEP-Gal semi-solid agar media, at 22°C for 8 days. Photographs were taken every 30 min.

**Supplementary Video 8. Penetration of a wild-type *S. cerevisiae* colony by *C. elegans*, example 1.** A *C. elegans* (N2) worm was placed onto YEPD semi-solid agar media containing a wild-type *S. cerevisiae* mat (PC538).

**Supplementary Video 9. Penetration of a wild-type *S. cerevisiae* colony by *C. elegans*, example 2.** A *C. elegans* (N2) worm placed onto YEPD semi-solid agar media with a wild-type *S. cerevisiae* mat (PC538)

**Supplementary Video 10. Penetration of a *flo11Δ* *S. cerevisiae* colony by *C. elegans*, example 1.** A *C. elegans* (N2) worm placed onto YEPD semi-solid agar media with a *flo11Δ* *S. cerevisiae* mat (PC1029).

**Supplementary Video 11. Penetration of a *flo11Δ S. cerevisiae* colony by *C. elegans*,**

**example 2.** A *C. elegans* (N2) worm placed onto YEPD semi-solid agar media with a *flo11Δ S. cerevisiae* mat (PC1029).

**Supplementary Video 12. Penetration of an OP50 *E. coli* colony by *C. elegans*,**

**example 1.** A *C. elegans* (N2) worm placed onto YEPD semi-solid agar media with OP50 *E. coli* mat.

**Supplementary Video 13. Penetration of an OP50 *E. coli* colony by *C. elegans*,**

**example 2.** A *C. elegans* (N2) worm placed onto YEPD semi-solid agar media with OP50 *E. coli* mat.

**Supplementary Video 14. Penetration of a wild-type *S. cerevisiae* colony by *glr-1(lof)***

***C. elegans*, example 1.** A *C. elegans glr-1(lof)* worm placed onto YEPD semi-solid agar media with a wild-type *S. cerevisiae* mat (PC538).

**Supplementary Video 15. Penetration of a wild-type *S. cerevisiae* colony by *glr-1(lof)***

***C. elegans*, example 2.** A *C. elegans glr-1(lof)* worm placed onto YEPD semi-solid agar media with a wild-type *S. cerevisiae* mat (PC538).

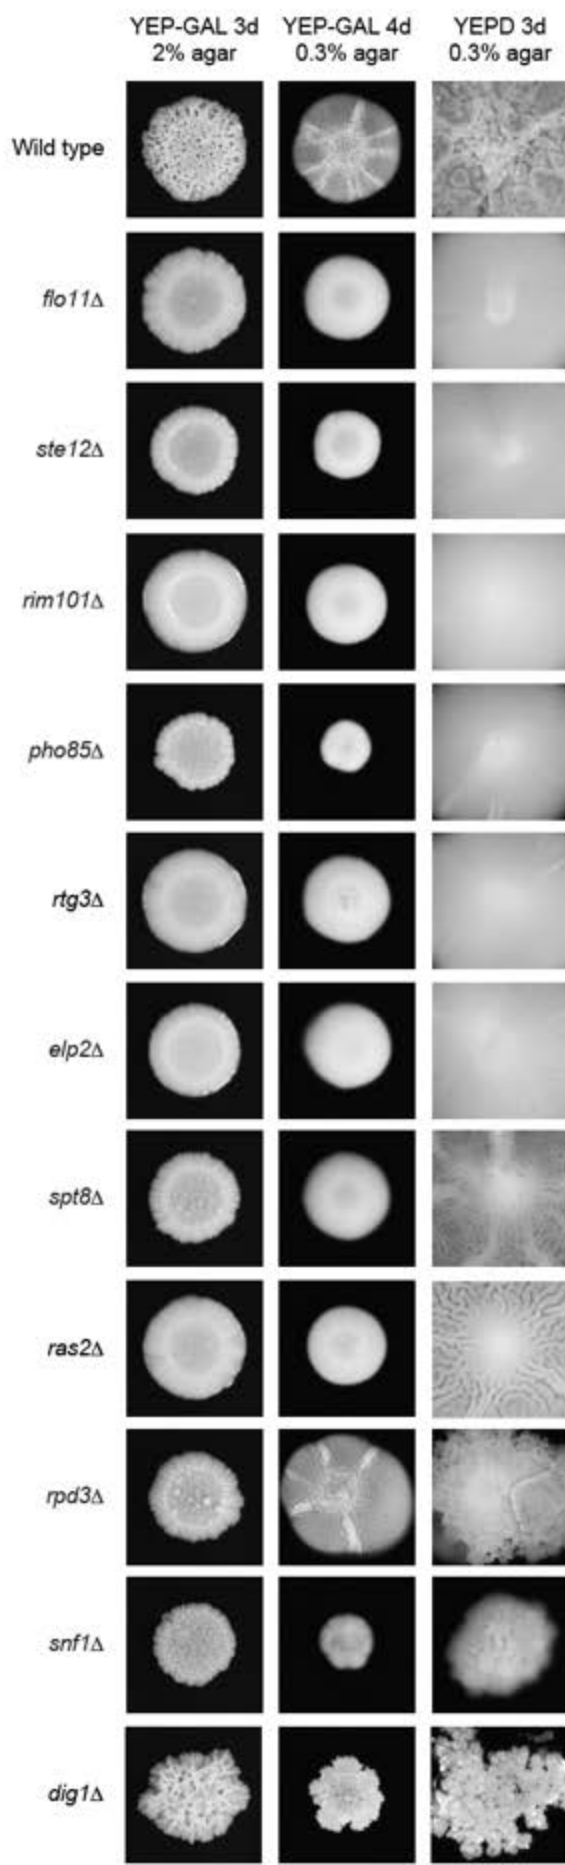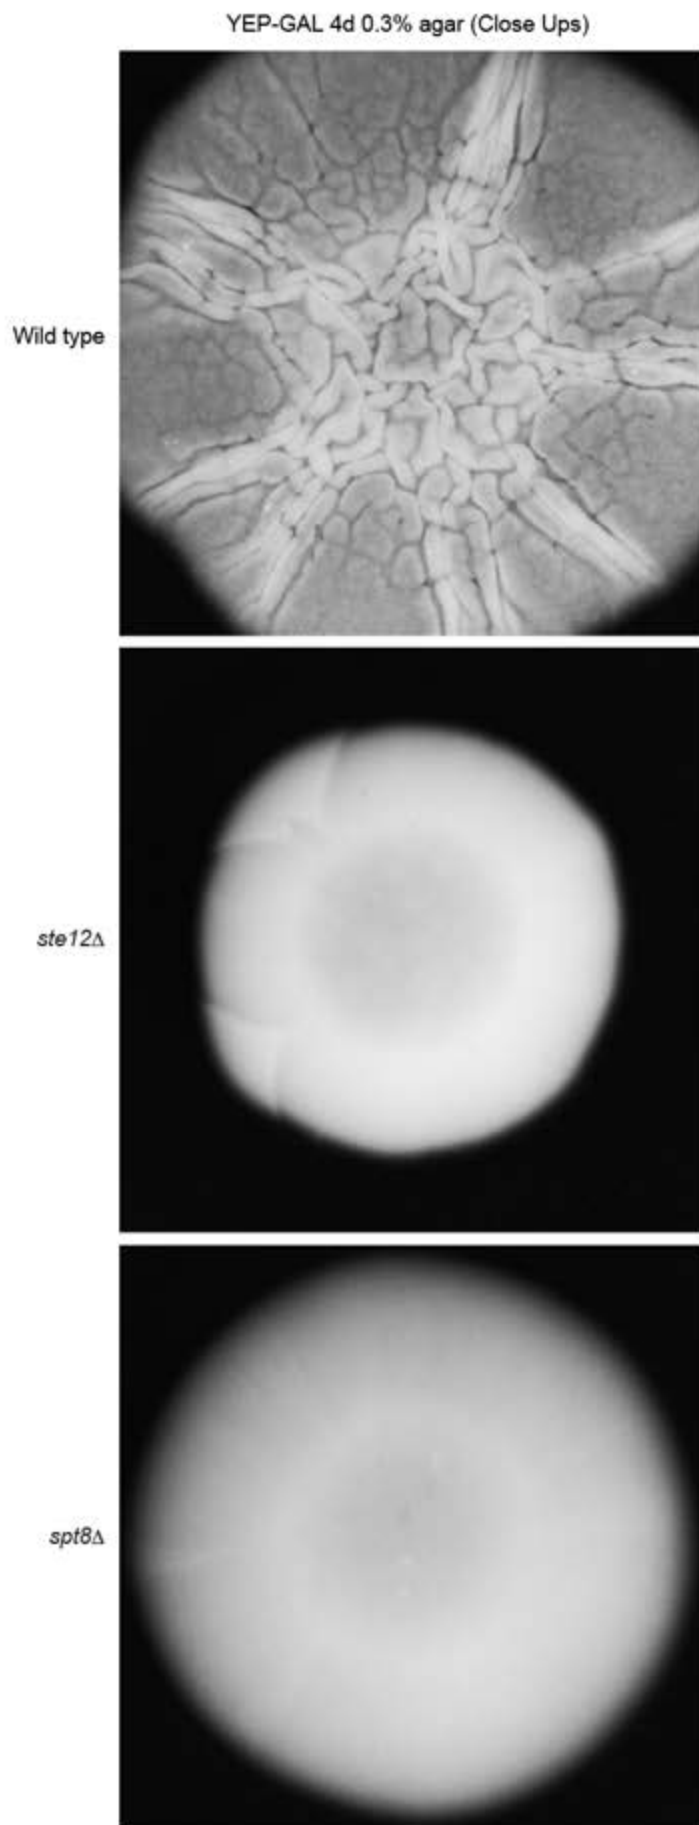

Fig.\_S2

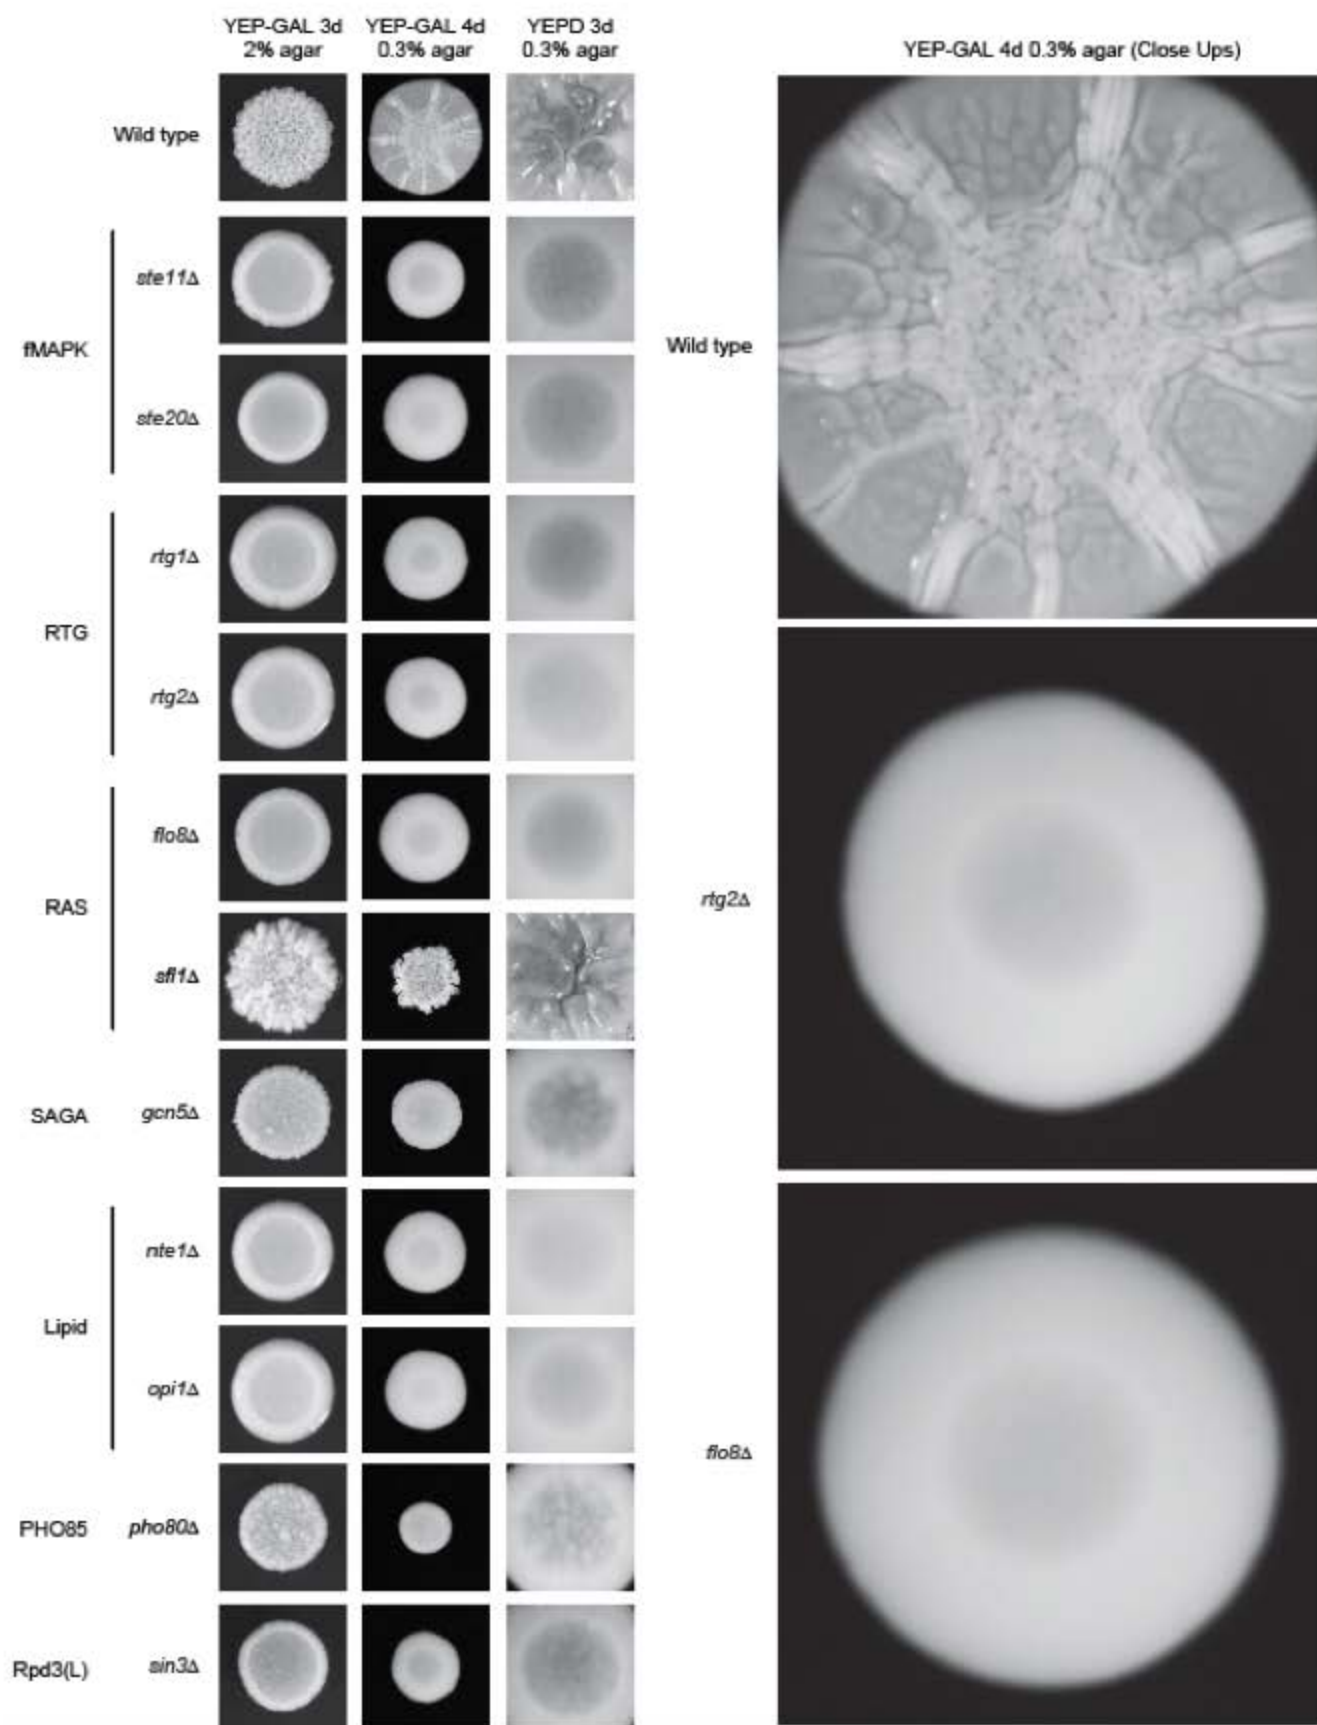

Fig. S3

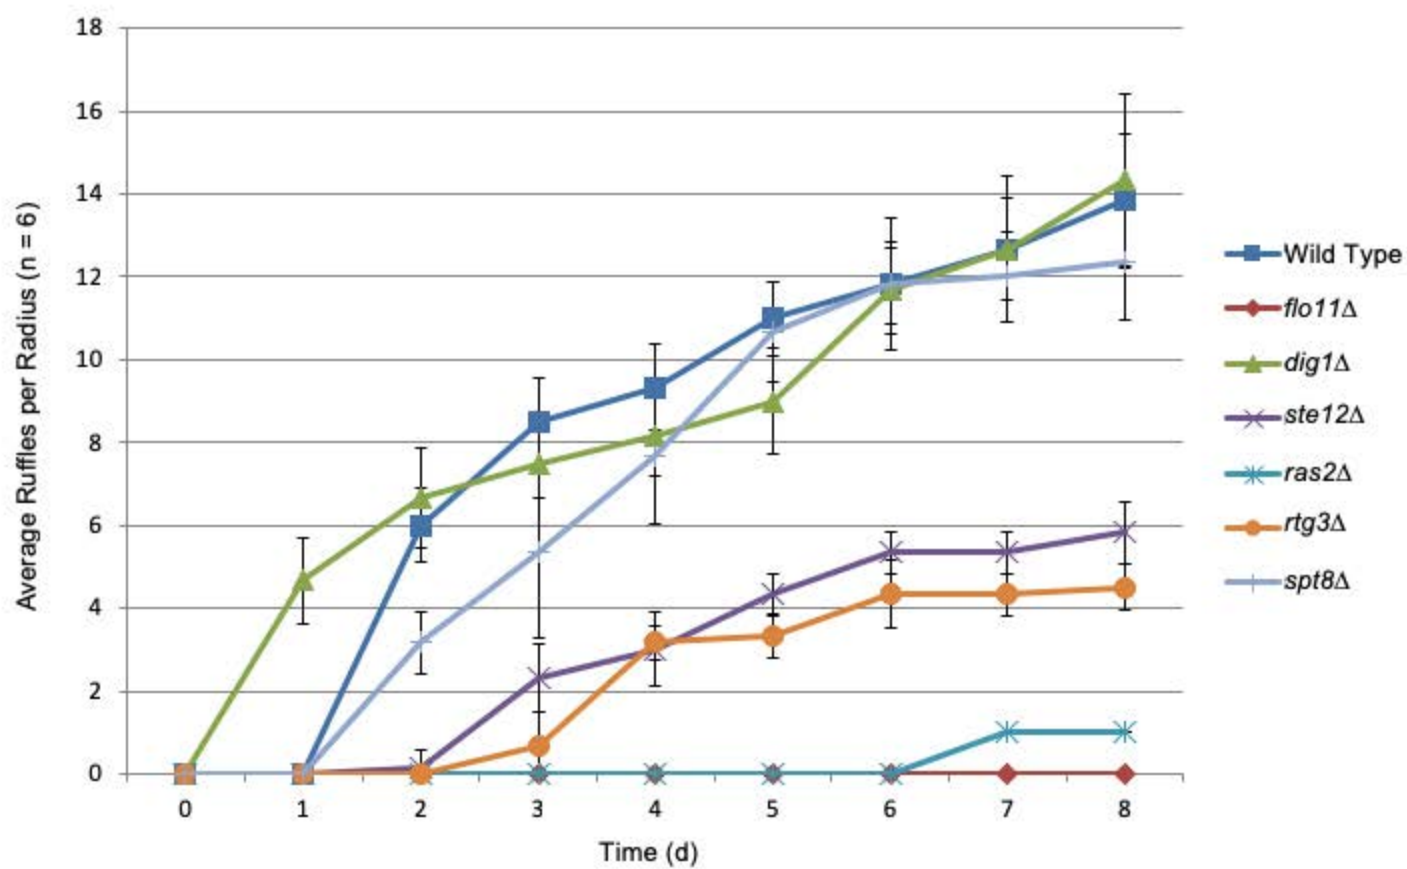

A

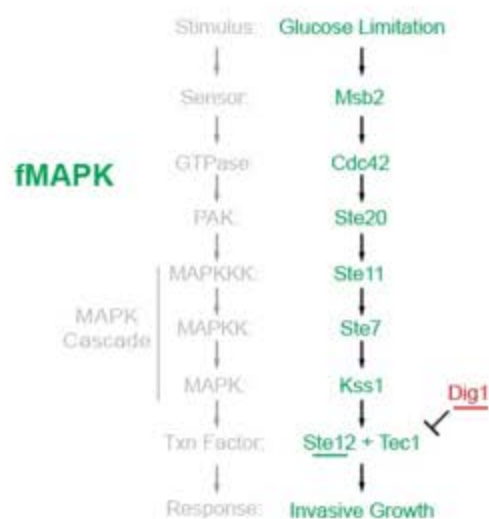

E

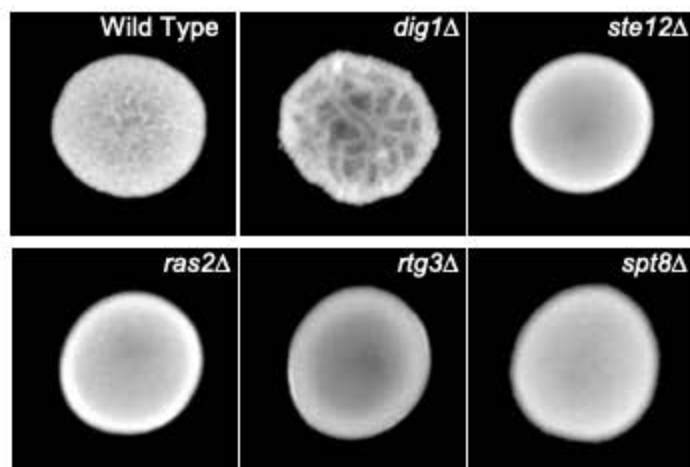

B

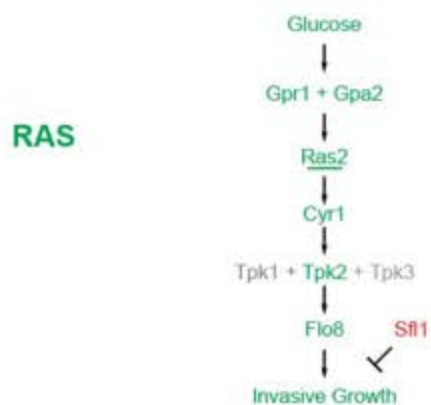

C

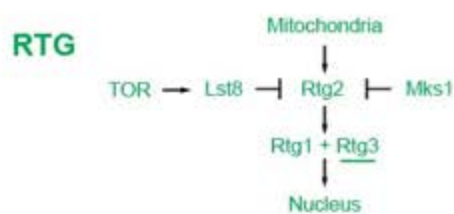

D

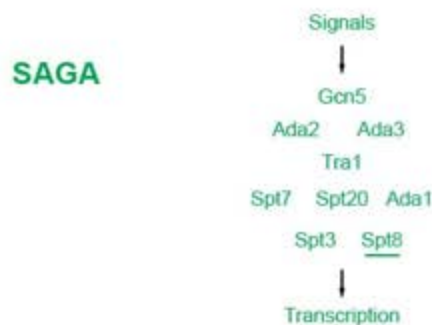

F

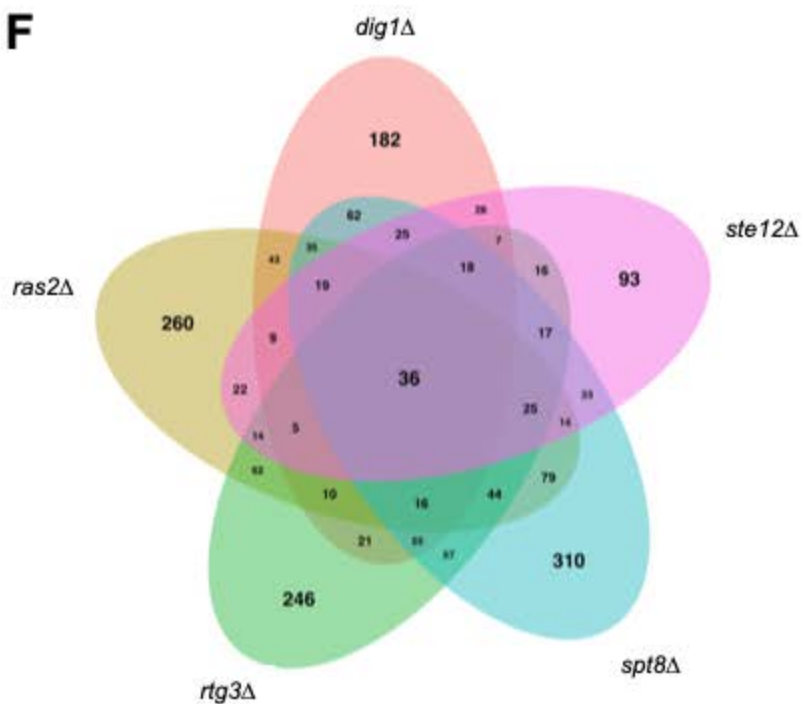

**A**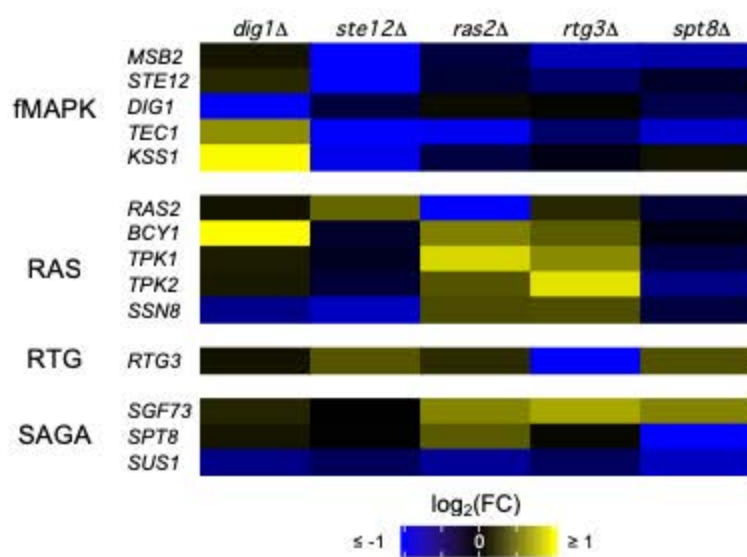**B**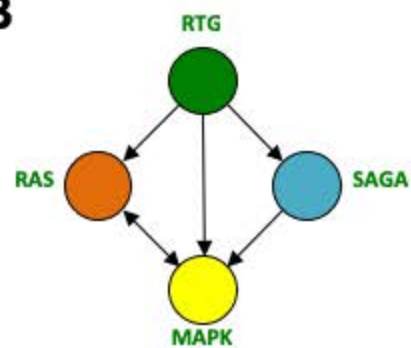

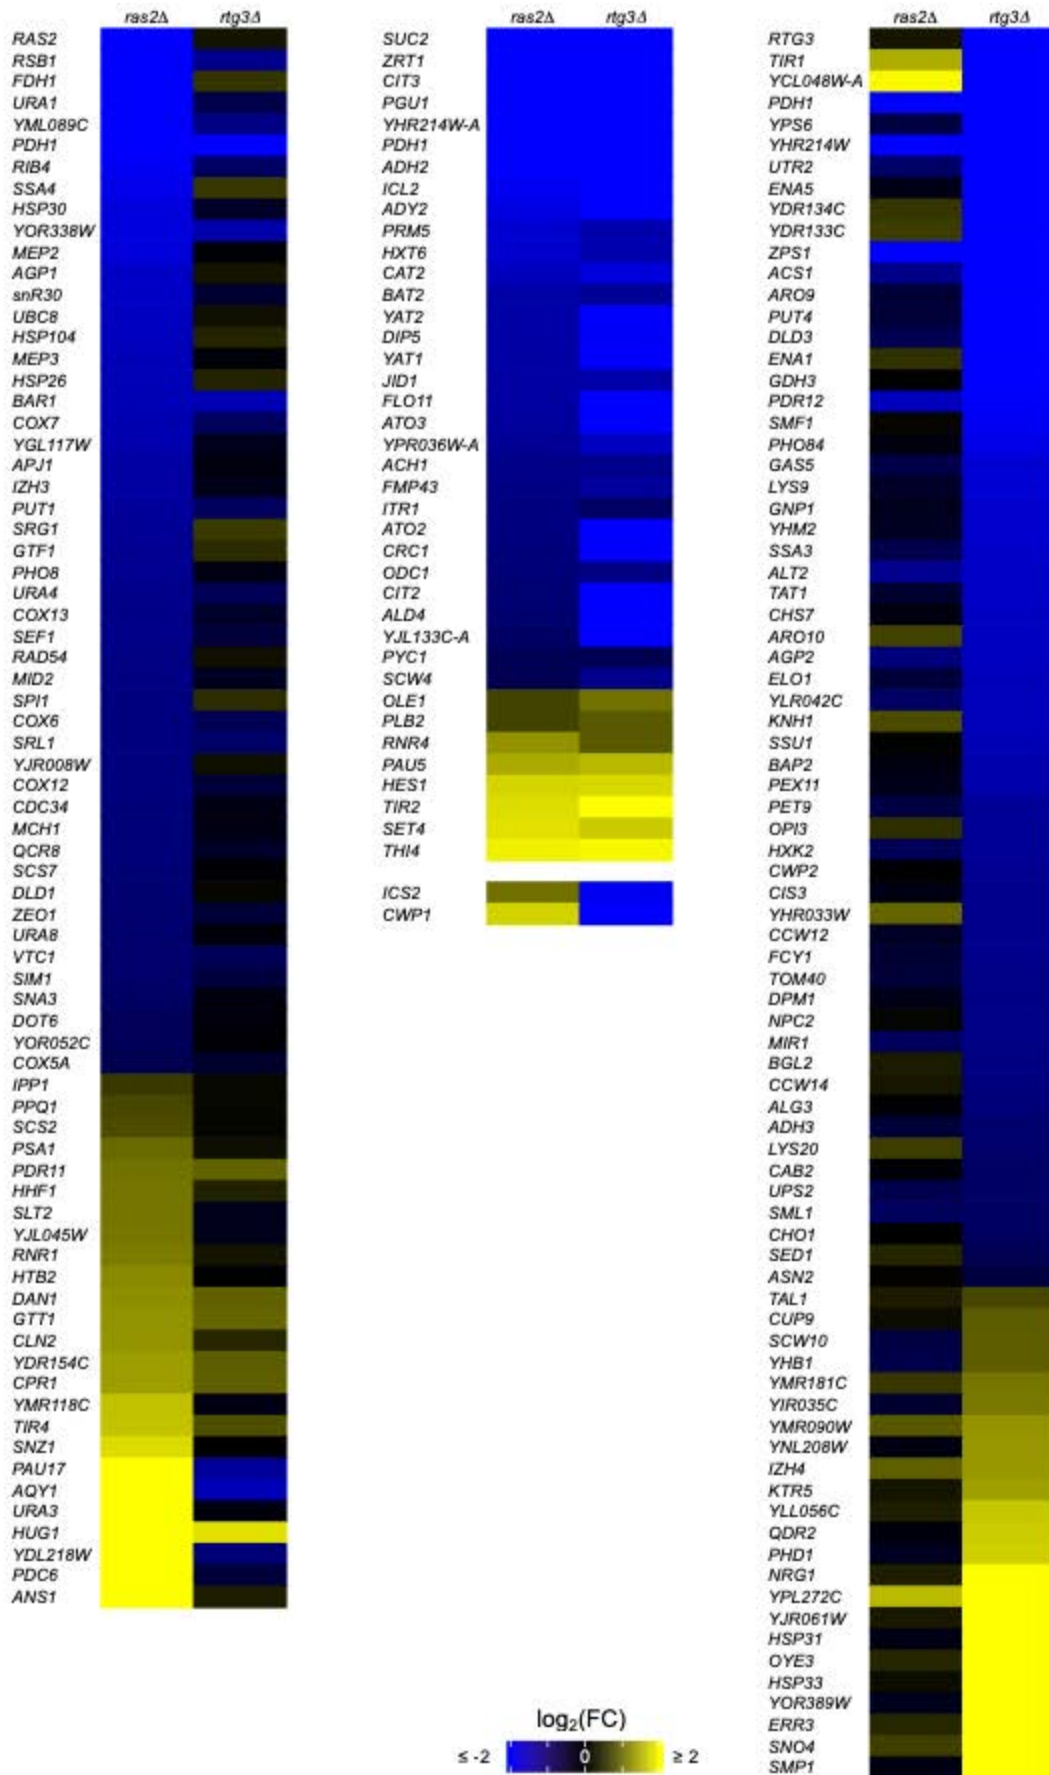

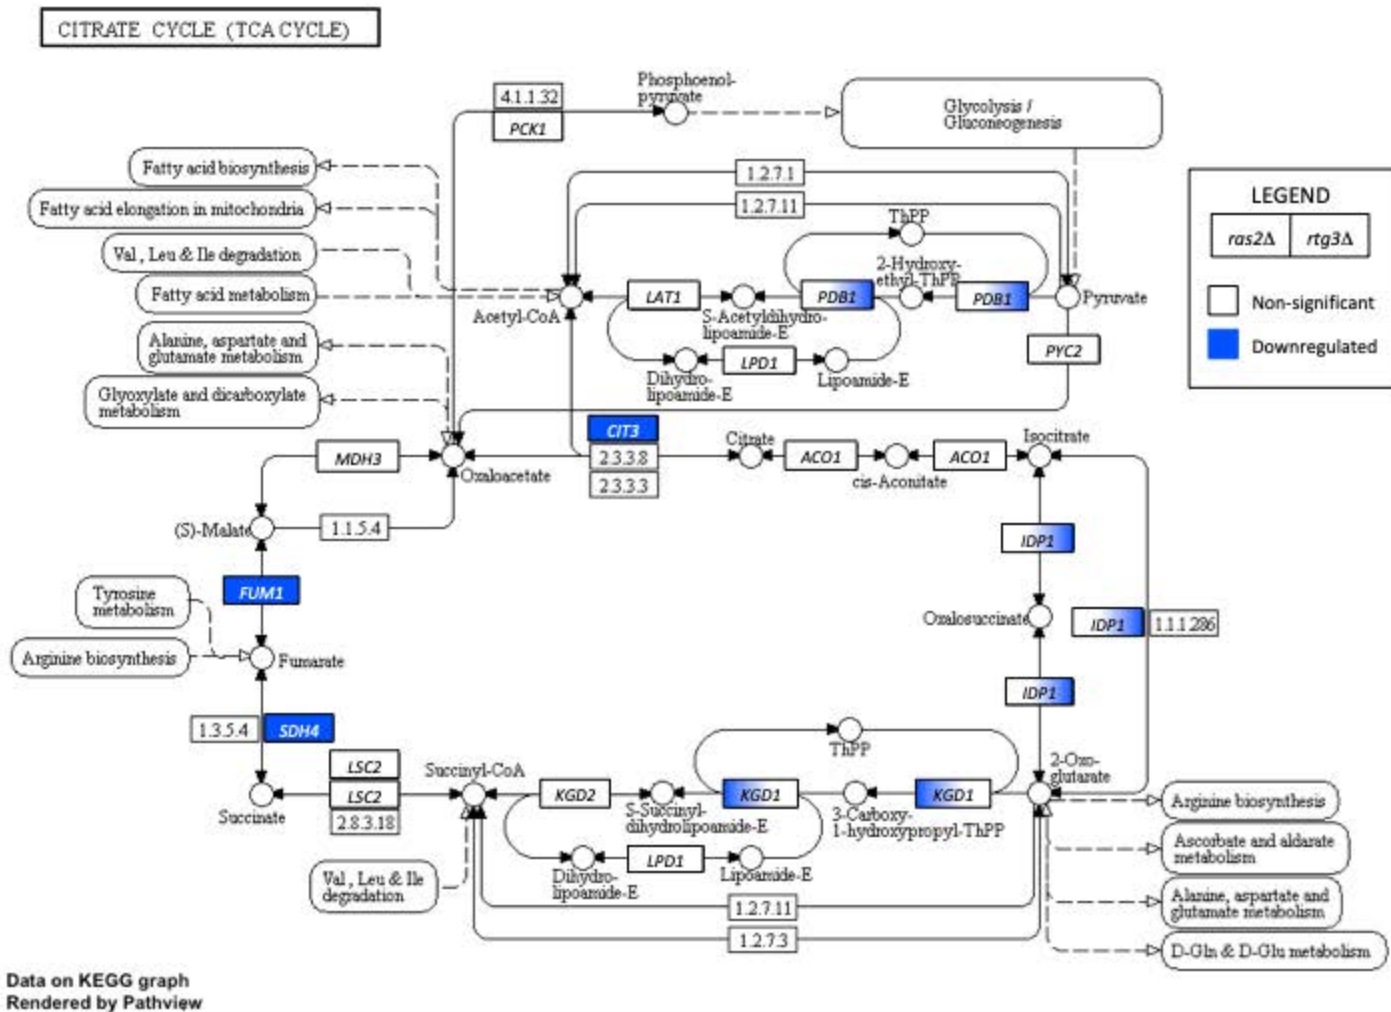

Fig. S8

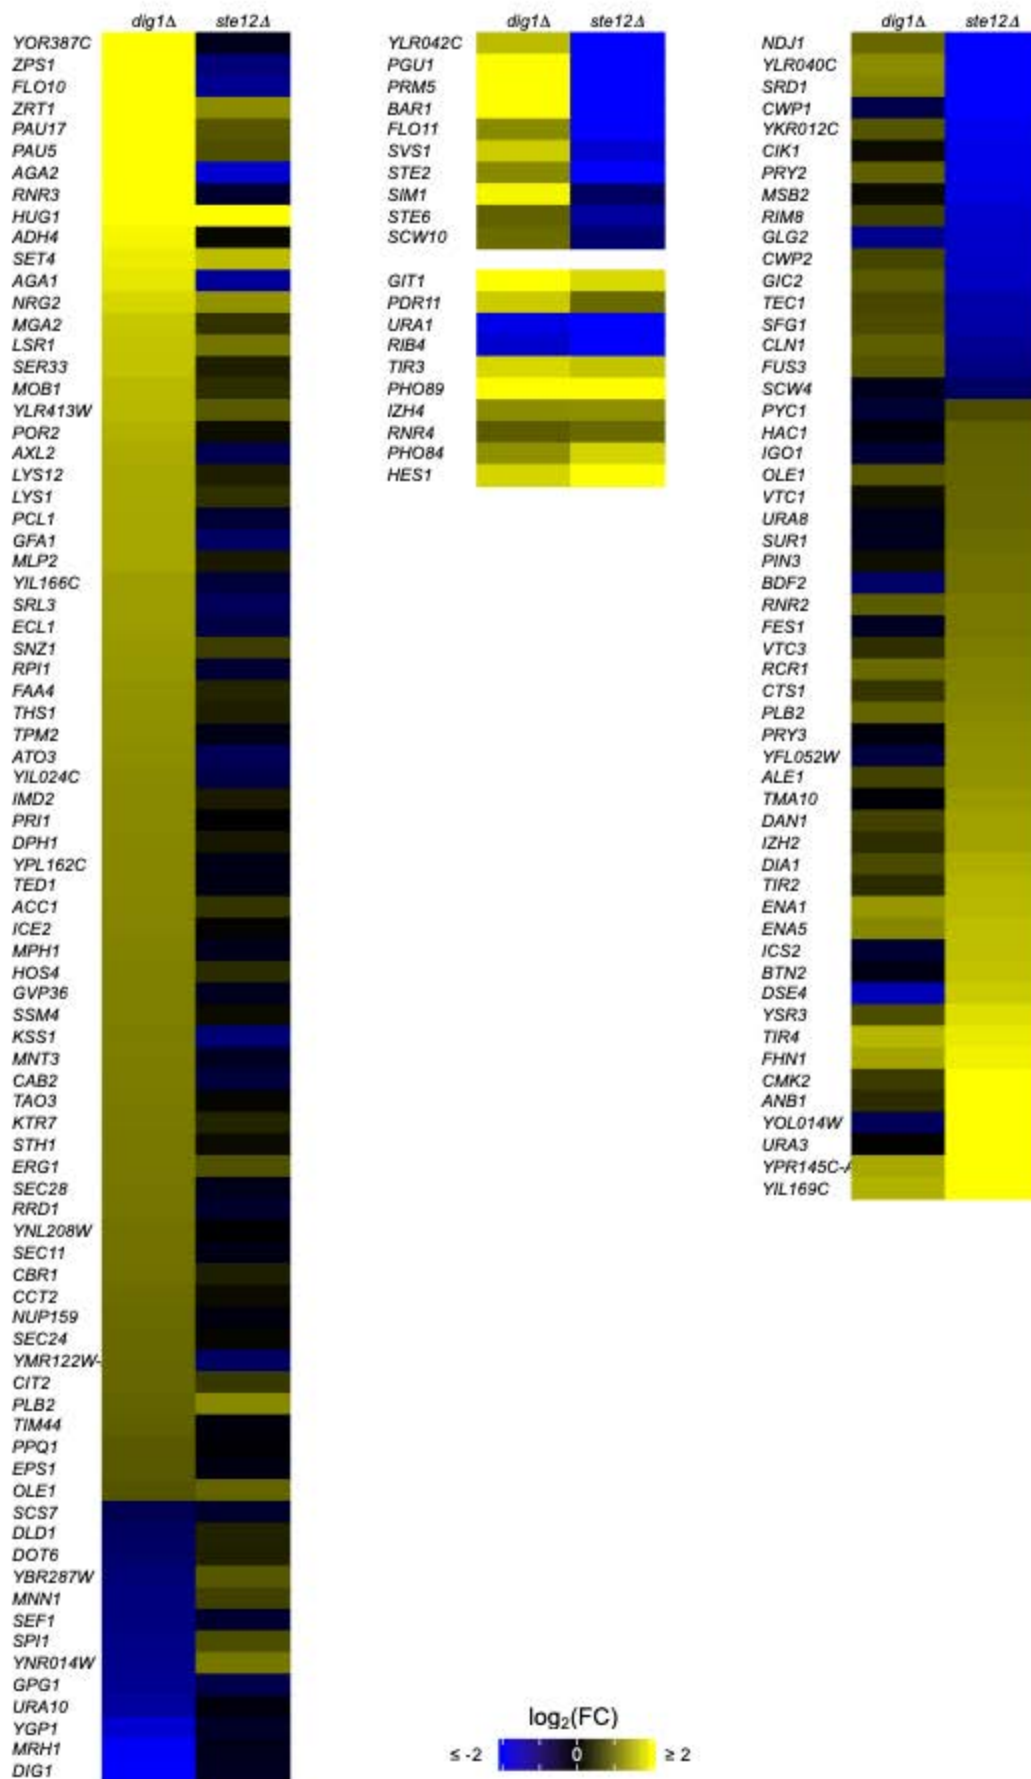

Fig. S9

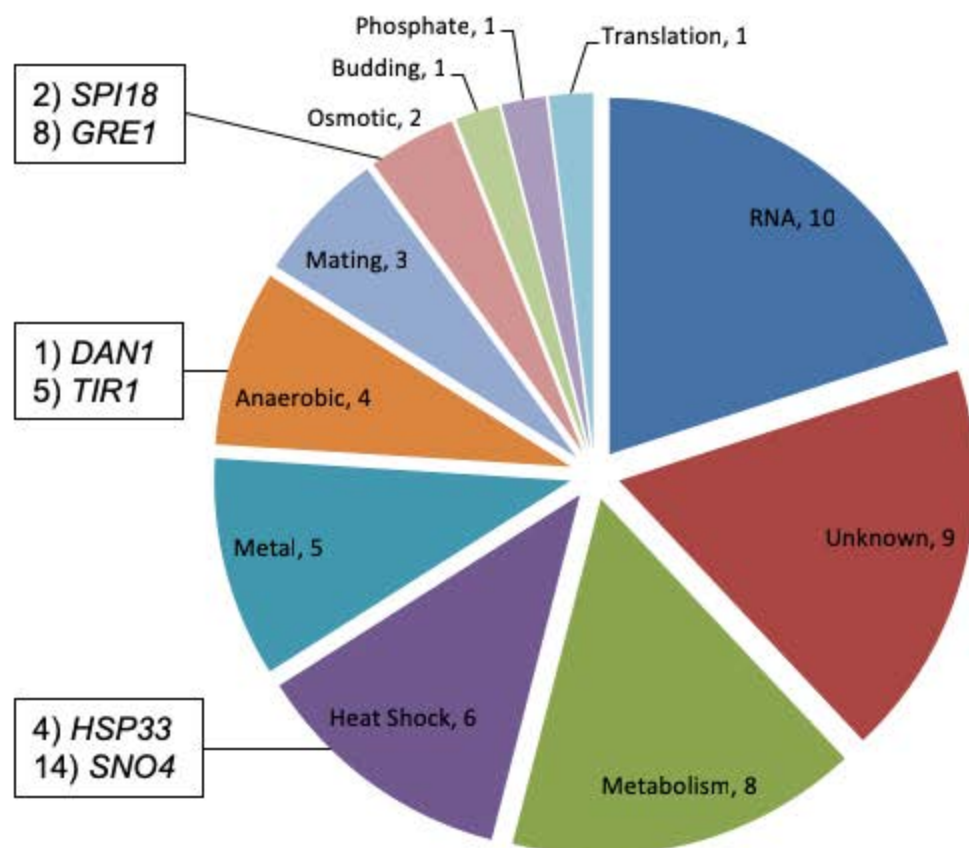

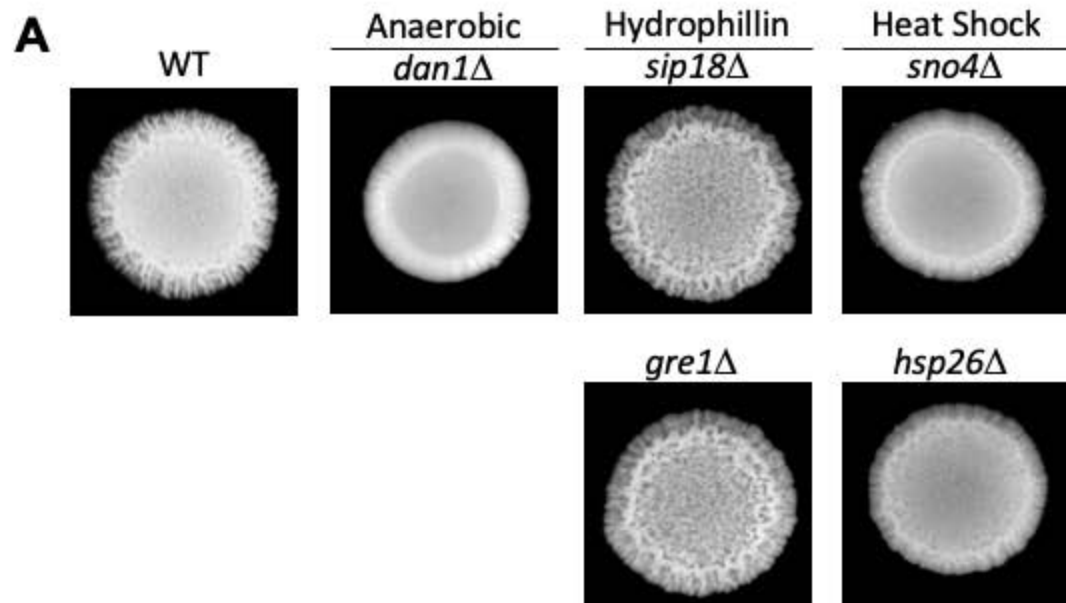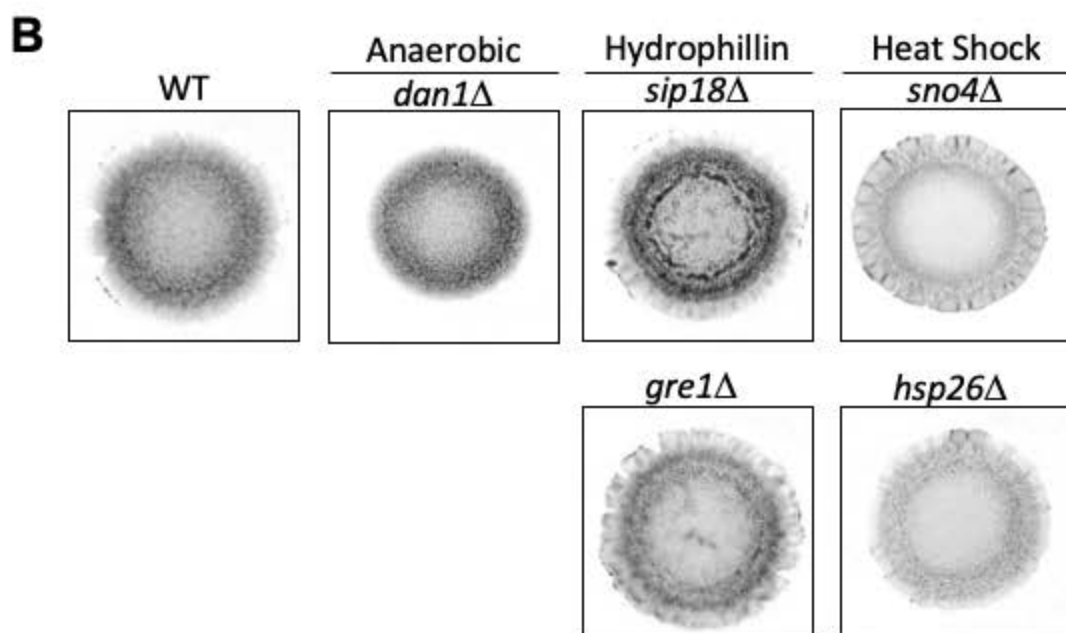

Fig. S11

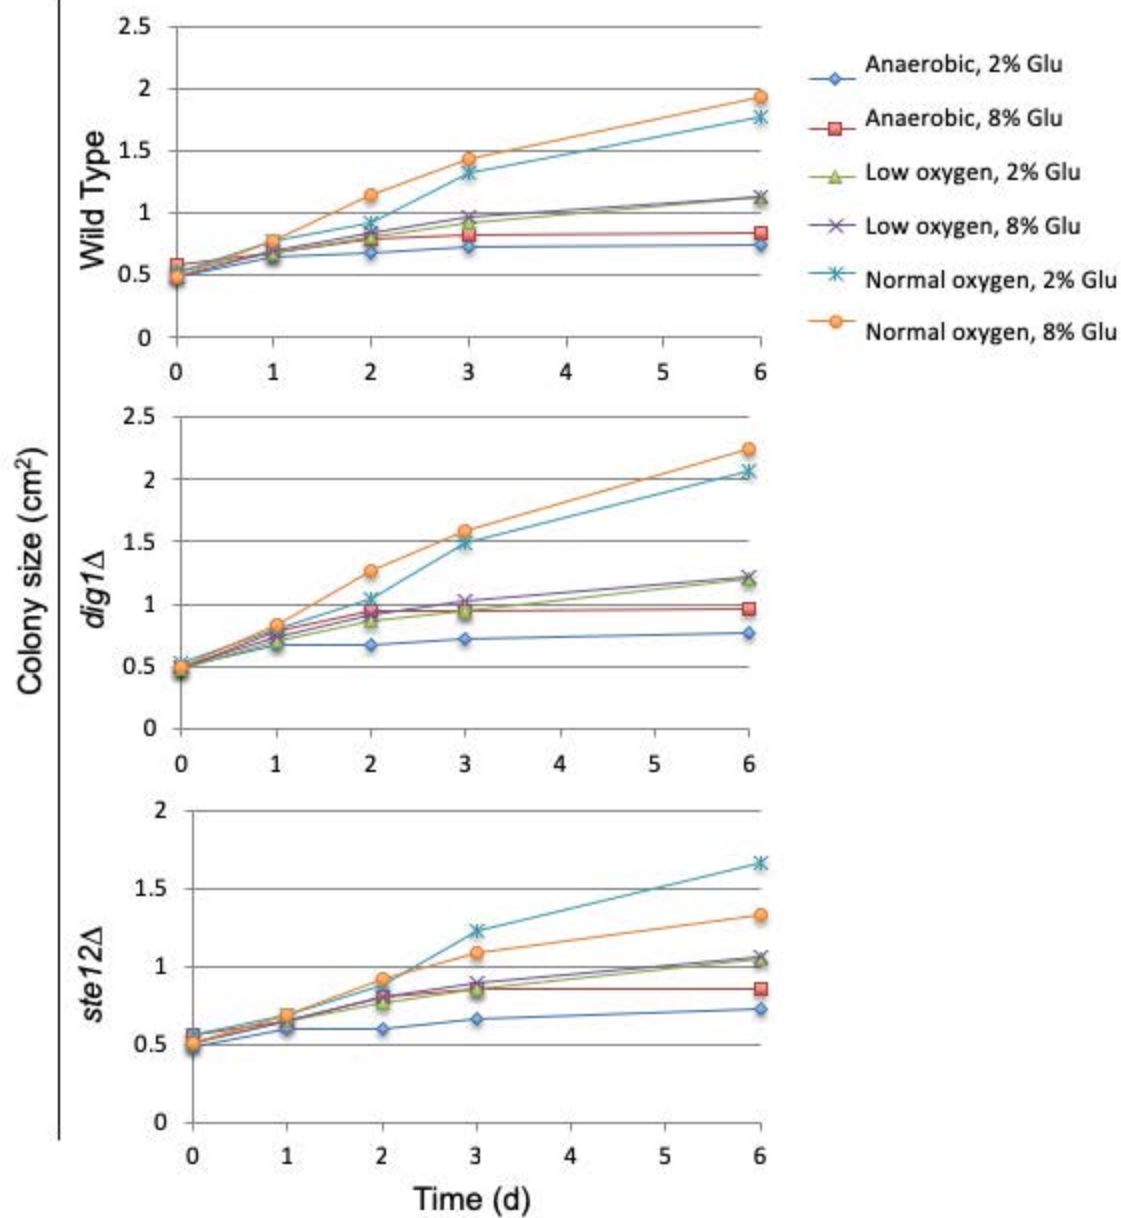

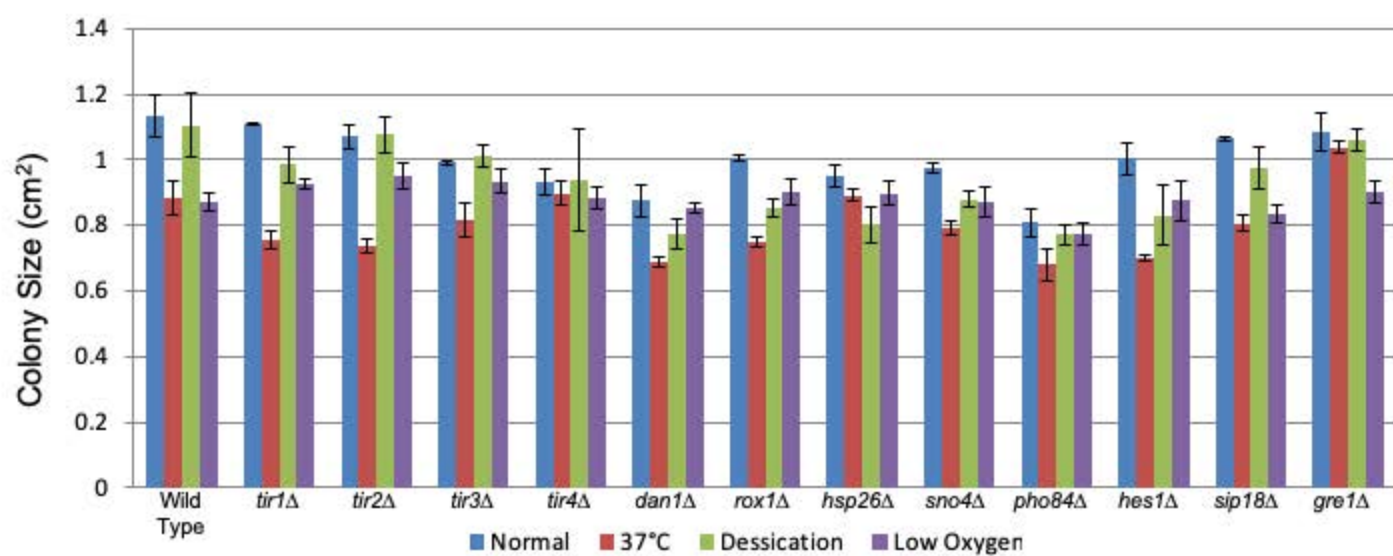

Supplement: Supplementary file 1 [file 1]
